# Supplementary material
Source: HighWire-hosted journal article supplement (https://cmajopen.ca/highwire/filestream/81339/field_highwire_adjunct_files/2/2020-0098-3-at.pdf)
Supplement: 2020-0098-3-at.pdf [file 2020-0098-3-at.pdf]

**Appendix 3 (as supplied by the authors):**

Supplementary Table S2 – Descriptive characteristics of patients admitted from long term care. LOS – Length of Stay. SMD – Standardized Mean Difference

|                                     | <b>All Admissions</b> | <b>LOS &lt;24 hours</b> | <b>LOS 24-72 hours</b> | <b>LOS &gt;72 hours</b> | <b>SMD</b> |
|-------------------------------------|-----------------------|-------------------------|------------------------|-------------------------|------------|
| Number of Admissions                | 21948                 | 1084                    | 4213                   | 16651                   |            |
| Length of Stay (median [IQR])       | 5.75 [3.12, 10.80]    | 0.61 [0.42, 0.78]       | 2.22 [1.67, 2.65]      | 7.62 [4.90, 13.34]      | 1.647      |
| IV Medication (%)                   | 19332 (88.1)          | 775 (71.5)              | 3525 (83.7)            | 15032 (90.3)            | 0.328      |
| Laboratory Testing (%)              | 21933 (99.9)          | 1075 (99.2)             | 4209 (99.9)            | 16649 (100.0)           | 0.090      |
| Any X-Ray Imaging(%)                | 20332 (92.6)          | 903 (83.3)              | 3701 (87.8)            | 15728 (94.5)            | 0.241      |
| Any CT-Scan (%)                     | 11571 (52.7)          | 398 (36.7)              | 1799 (42.7)            | 9374 (56.3)             | 0.266      |
| Any Ultrasound (%)                  | 5794 (26.4)           | 56 (5.2)                | 586 (13.9)             | 5152 (30.9)             | 0.476      |
| Any MRI (%)                         | 920 (4.2)             | 5 (0.5)                 | 41 (1.0)               | 874 (5.2)               | 0.200      |
| Use of Interventional Radiology (%) | 1716 (7.8)            | 8 (0.7)                 | 82 (1.9)               | 1626 (9.8)              | 0.285      |
| RBC Transfusion (%)                 | 1707 (7.8)            | 34 (3.1)                | 199 (4.7)              | 1474 (8.9)              | 0.163      |
| Endoscopy (%)                       | 1234 (5.6)            | 16 (1.5)                | 148 (3.5)              | 1070 (6.4)              | 0.174      |
| ICU Admission (%)                   | 1605 (7.3)            | 23 (2.1)                | 108 (2.6)              | 1474 (8.9)              | 0.201      |
| Death (%)                           | 2710 (12.3)           | 285 (26.3)              | 487 (11.6)             | 1938 (11.6)             | 0.255      |
| Readmission to GIM in 30 days (%)   | 2698 (14.1)           | 102 (12.8)              | 476 (12.8)             | 2120 (14.5)             | 0.032      |
